# Supplementary material
Source: Research Square preprint supplement (doi:10.21203/rs.3.rs-9624470/v1)
Supplement: Supplementary file 1 [file c7a2b4cb5110acb598235153.docx]

**Supporting Information**

**Regulatory Role of CAPS in Osteoarthritis and Experimental Validation of Polydatin as a Potential Therapeutic Intervention**

Zhichang Zhang1†, Zongye Zhang1†, Xiunan Wu1†, Zhendong Liu3, Zhi Sha1, Jinpeng Gao1, Zhenxing Hou3, Dongdong Wang1 and Yanzheng Gao3*

1. Zhengzhou University People's Hospital, Henan Provincial People's Hospital.

1. Henan University People's Hospital, Henan Provincial People's Hospital
2. Department of Surgery of Spine and Spinal Cord, Henan Provincial People's Hospital, Zhengzhou, 471003, China.

**Contents**

**WGCNA-based transcriptional module identification…...……………...Figure S1**

**GO enrichment analysis of OA candidate genes…...…………………...... Figure S2**

**Single-cell data QC and clustering annotation…...……………………..... Figure S3**

**CellChat-based intercellular signaling analysis…...…………………...... Figure S4**

**Toxicity evaluation of polydatin………........…………………...……..... Figure S5**

**
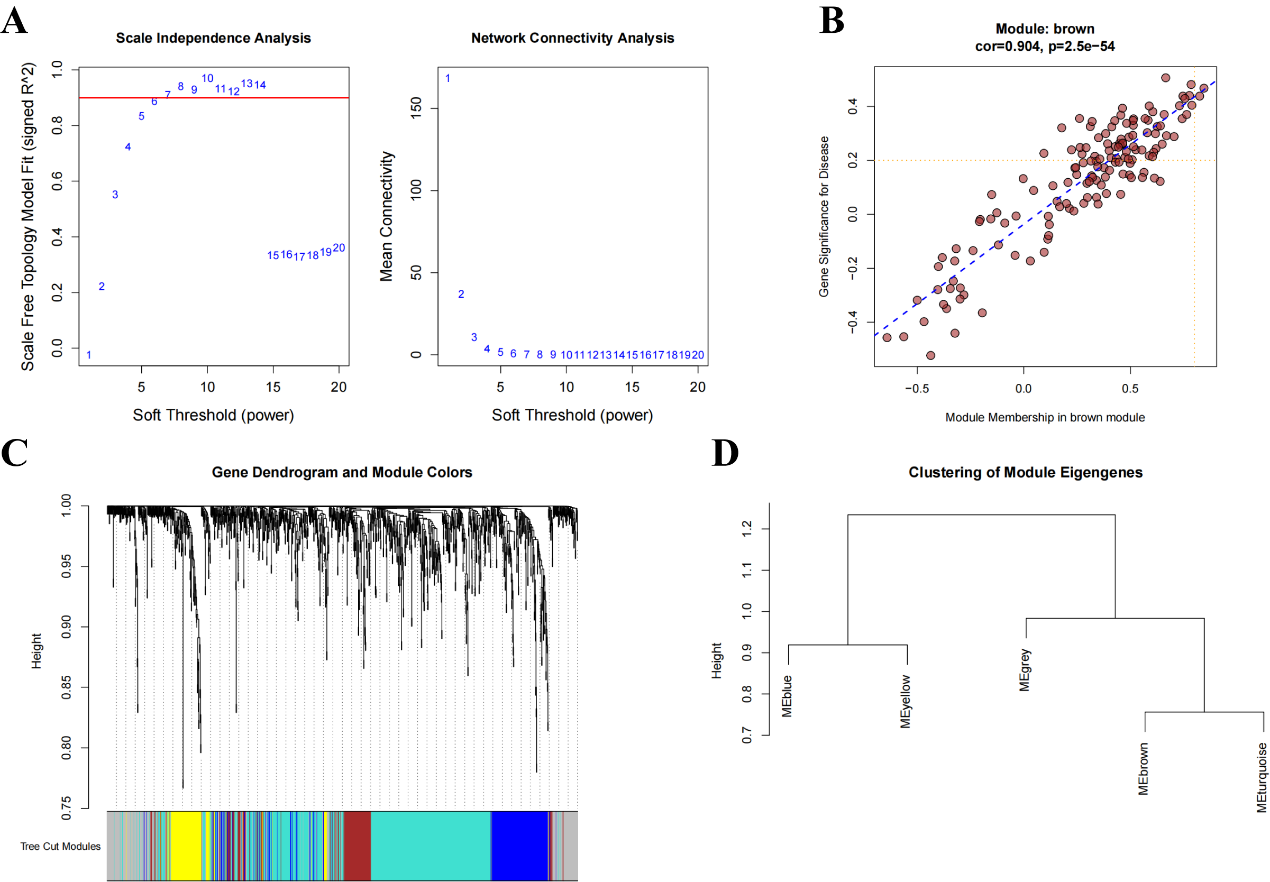
**

**Figure S1: WGCNA-based transcriptional module identification:** WGCNA identified five transcriptional modules using optimal soft-thresholding power (β=20) with scale-free topology (R²=0.9) and preserved biological connectivity (Figs. S1A-D).

**
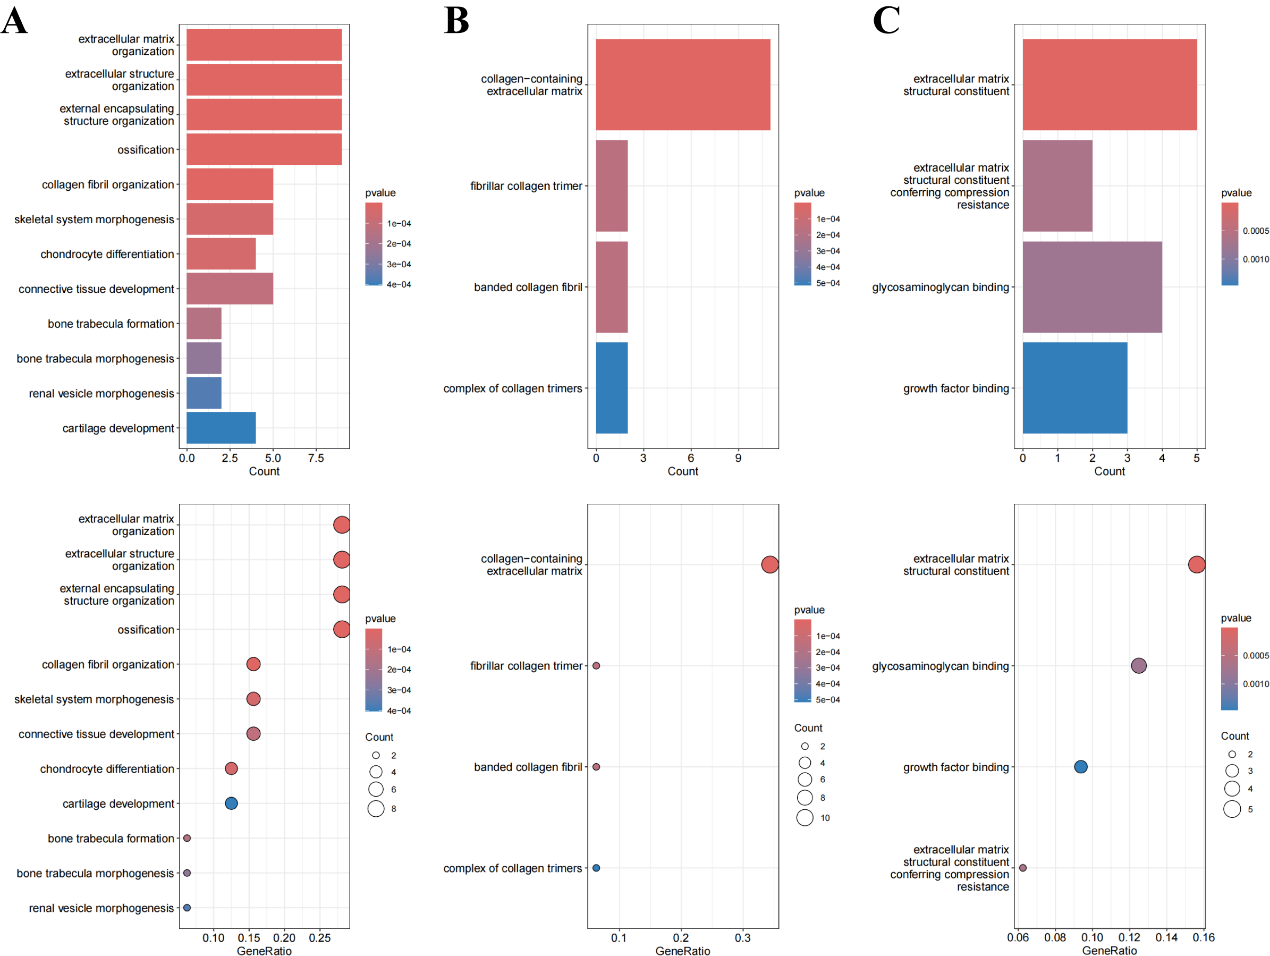
**

**Figure S2: GO enrichment analysis of OA candidate genes:** GO analysis (FDR<0.05) showed 35 candidate genes enriched in ECM macromolecular assembly processes (GO:0030198, GO:0005581, GO:0005201) (Figs. S2A-C).

**
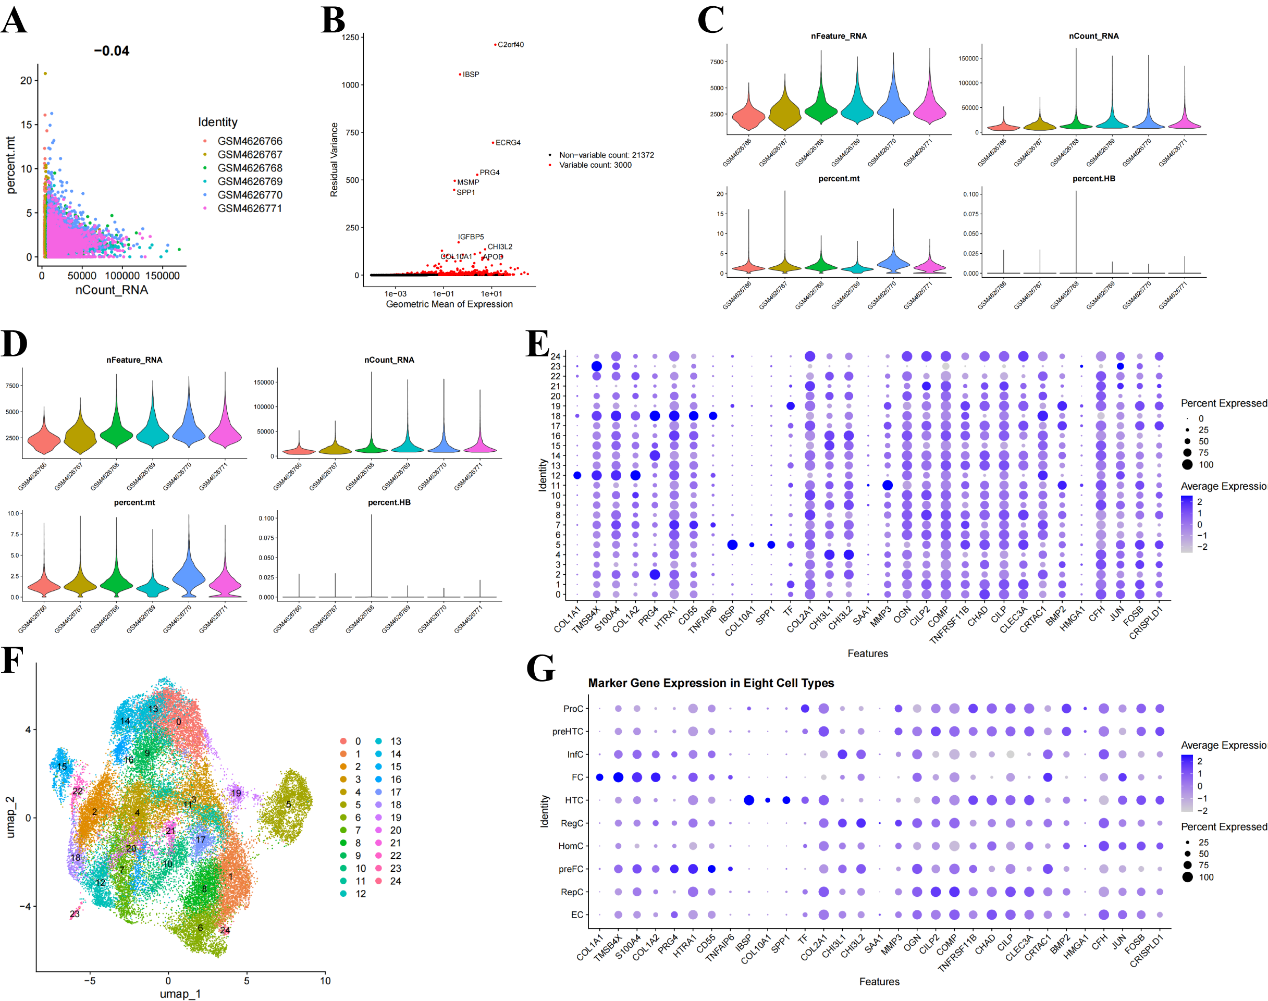
Figure S3: Single-cell data QC and clustering annotation:** (A): Single-cell quality control (QC) results; (B): Highly variable gene assessment; (C): Principal component analysis (PCA) verifying sample homogeneity; (D): Sample integrity confirmation; (E): UMAP-based clustering of 24 cell clusters; (F): Marker gene profiling for cell annotation; (G): 10 principal cell type annotations (Figs. S3A-G).

**
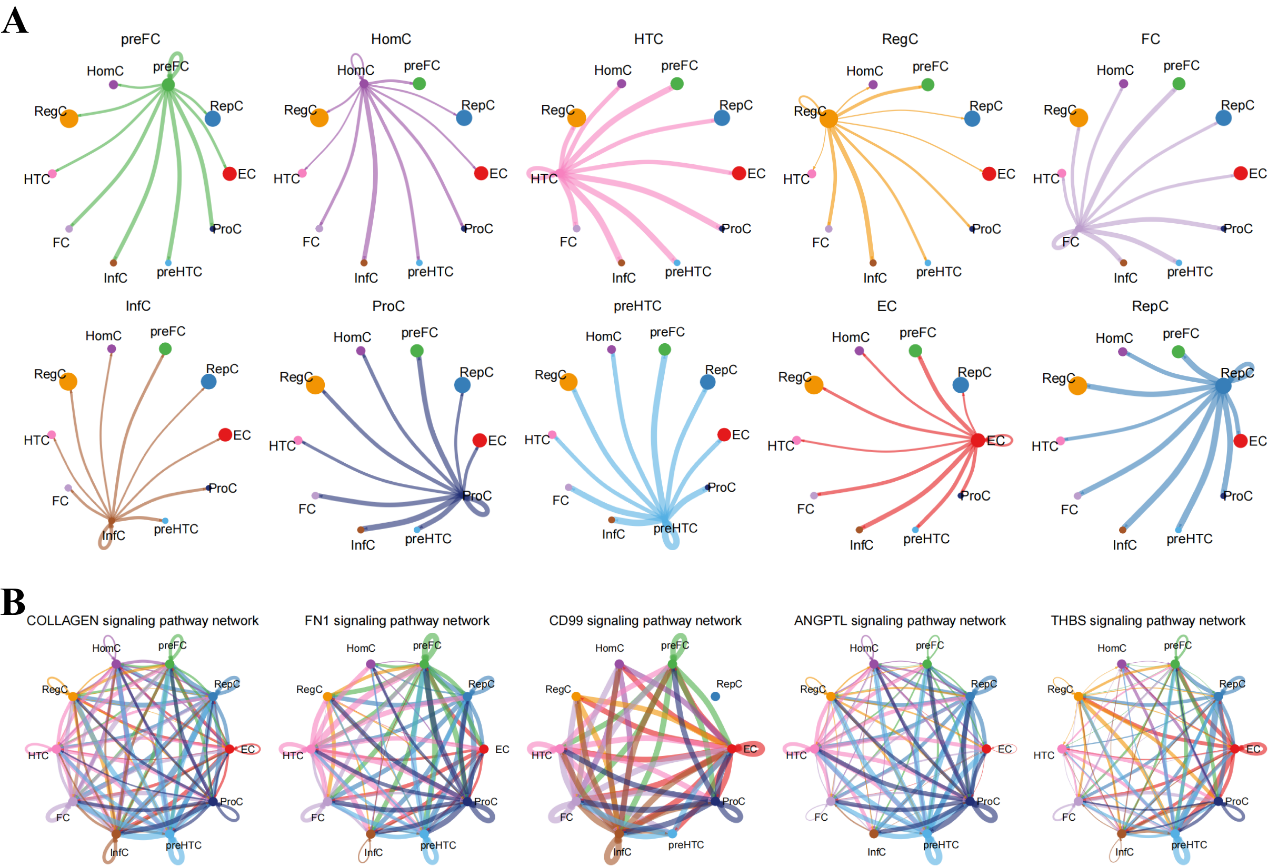
Figure S4: CellChat-based intercellular signaling analysis:** (A): Heterogeneous intercellular interaction networks identified by CellChat; (B): COLLAGEN/FN1 ligand-receptor-mediated ECM communication pathways (Figs. S4A-B).

**
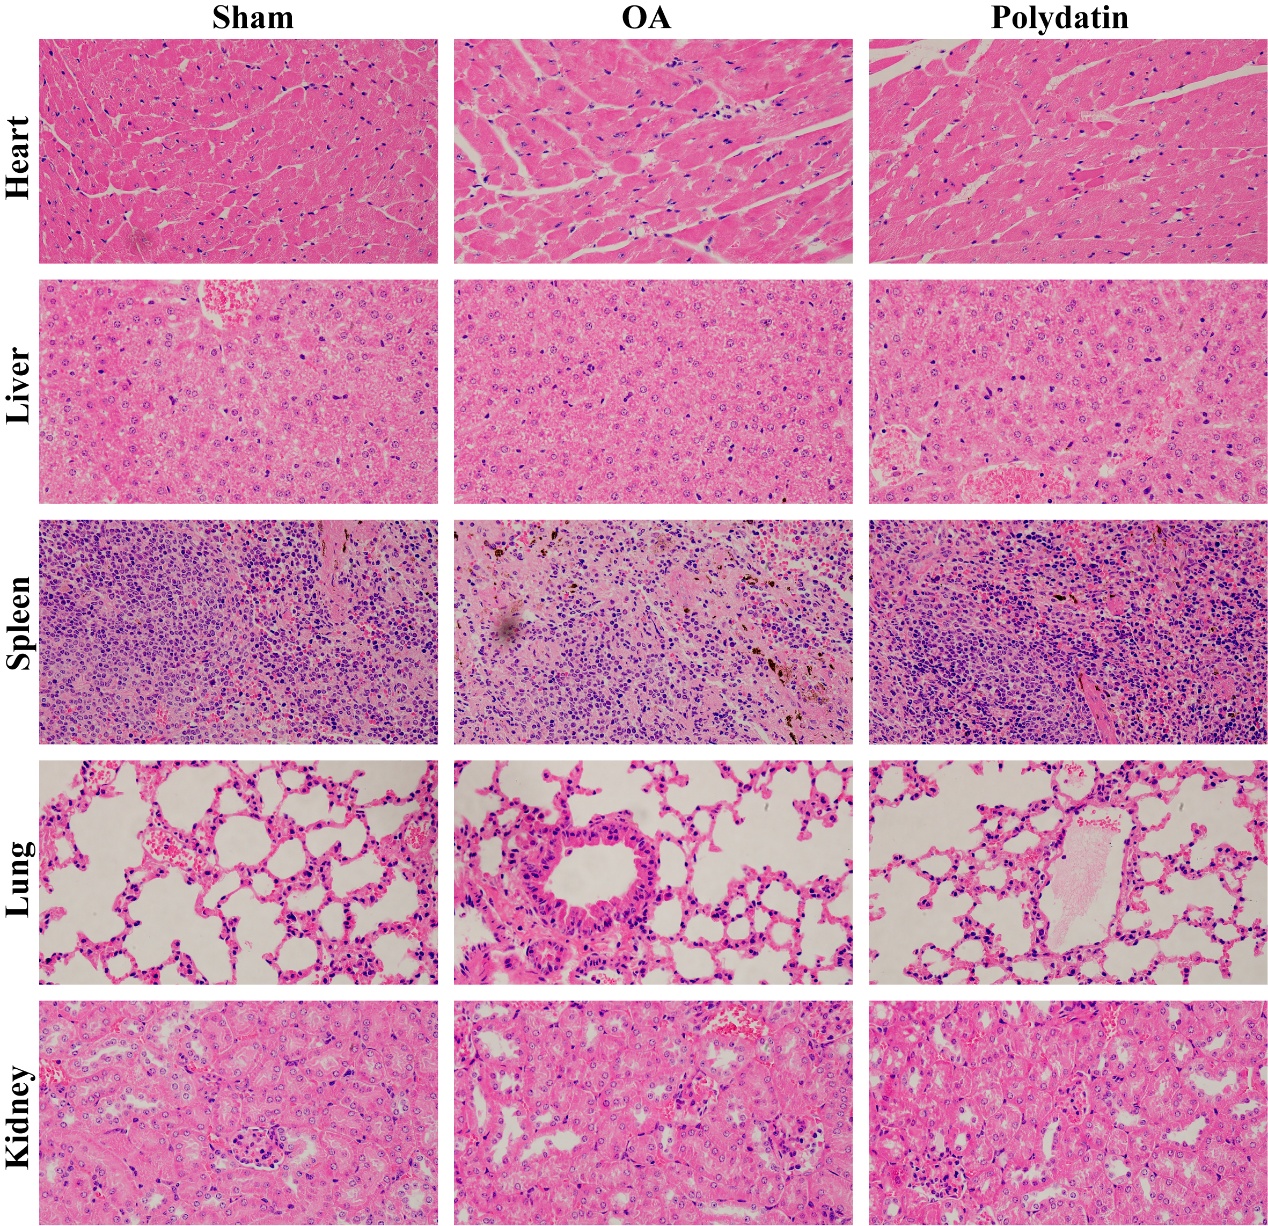
Figure S5: Toxicity evaluation of polydatin:** Histochemical sections of mouse heart, liver, spleen, lungs, and kidneys confirming polydatin has no toxic effects (Fig. S5).
